# Supplementary material for: The molecular and functional landscape of resistance to immune checkpoint blockade in melanoma
Source: PubMed Central journal article supplement (PMC10024679; doi:10.1038/s41467-023-36979-y), 2023-03-18
Supplement: 41467_2023_36979_MOESM1_ESM.pdf [file 41467_2023_36979_MOESM1_ESM.pdf]

Figure S1

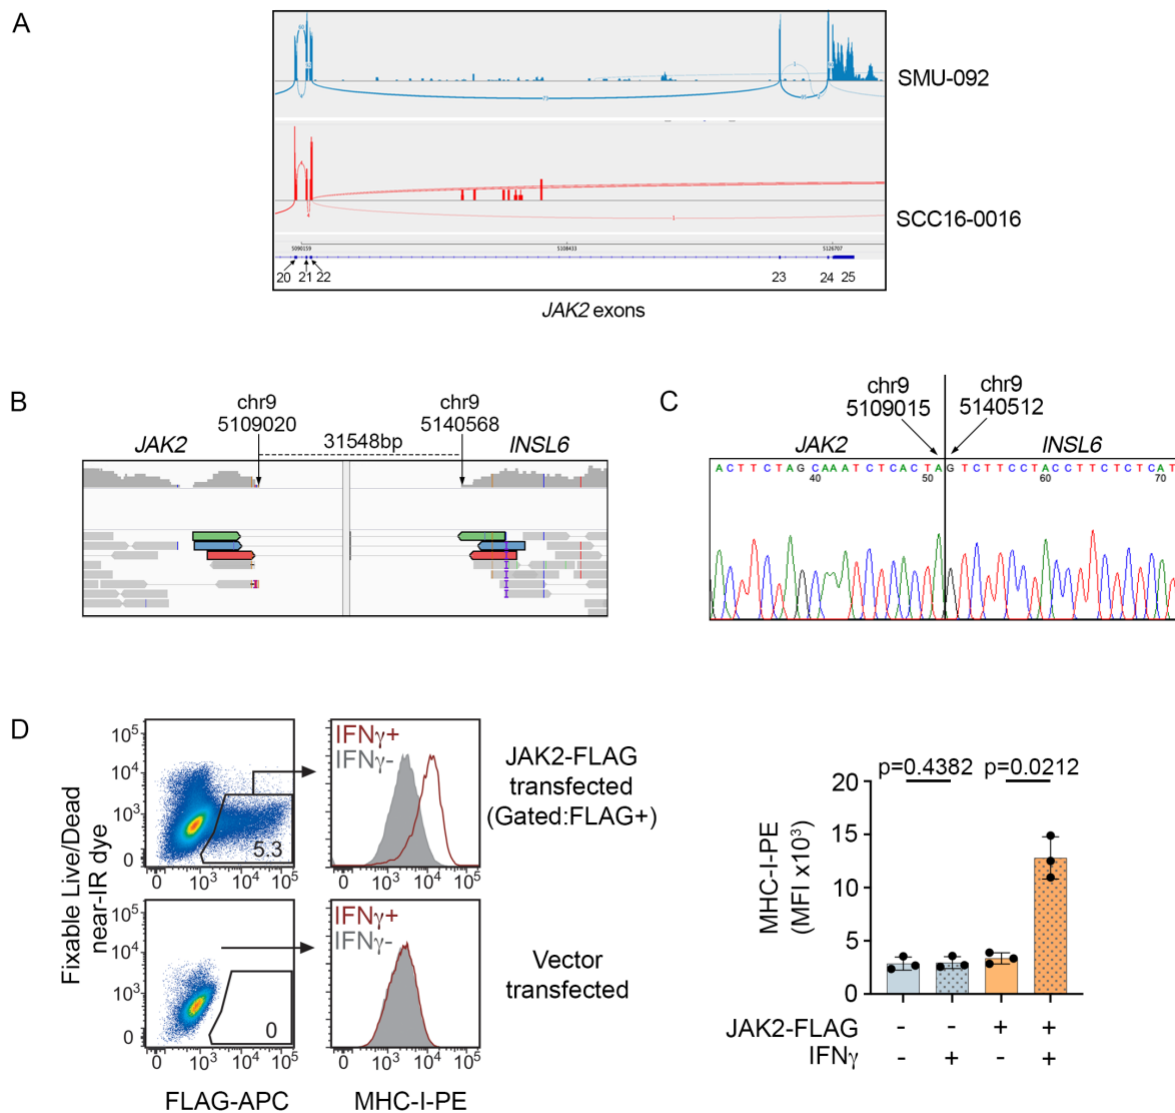

**Fig. S1: Whole exome and genome analysis and functional validation of SCC16-0016**

- Transcriptome analysis of the SCC16-0016 PD1 PROG cell line (not responsive to IFN $\gamma$  stimulation) showing *JAK2* deletion compared to SMU-092 (responsive to IFN $\gamma$  stimulation). *JAK2* exons 20-25 are shown.
- Whole genome sequencing analysis of the SCC16-0016 PD1 PROG cell line showing *JAK2* deletion. Chromosome positions are based on human genome assembly hg38.
- Chromatogram from Sanger sequencing of the SCC16-0016 PD1 PROG cell line DNA showing fusion between the chromosome 9p24.1 genes *JAK2* and *INSL6*.
- Scatter plots showing expression of MHC-I on JAK2-FLAG-transfected (expression shown for FLAG+ cells) and vector control-transfected SCC16-0016 cells, following 48h treatment with IFN $\gamma$  (1000 U/ml). Histogram shows the mean $\pm$ sd of MHC-I-PE level (median fluorescence intensity; MFI, n=3 biologically independent experiments). Data were compared using one-way ANOVA with Sidak's multiple comparison test, exact p values are shown.

Figure S2

A

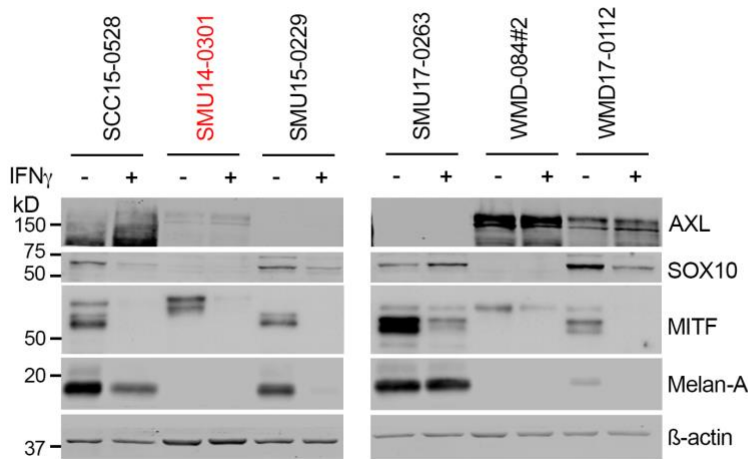

B

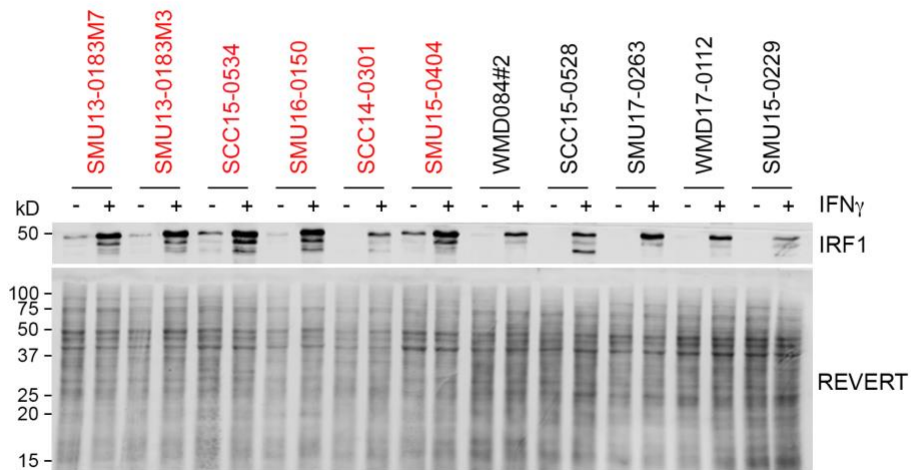

**Fig. S2: Persistent IFN $\gamma$  signaling in PD1 PROG melanoma**

- A. Accumulation of differentiation markers AXL, SOX10, MITF and Melan-A in a subset of PD1 PROG melanoma cells. SMU14-0301 highlighted in red has intrinsic IFN $\gamma$  signaling. Remaining PD1 PROG differentiation analysis has been published elsewhere<sup>1</sup>. Experiments repeated independently at least three times.
- B. Accumulation of the IRF1 protein in PD1 PROG cell lines (n=11), 24 h after treatment with vehicle control (-) or IFN $\gamma$  (1000 U/ml). PD1 PROG cell lines with intrinsic IFN $\gamma$  are indicated in red. Experiments repeated independently at least three times.

Figure S3

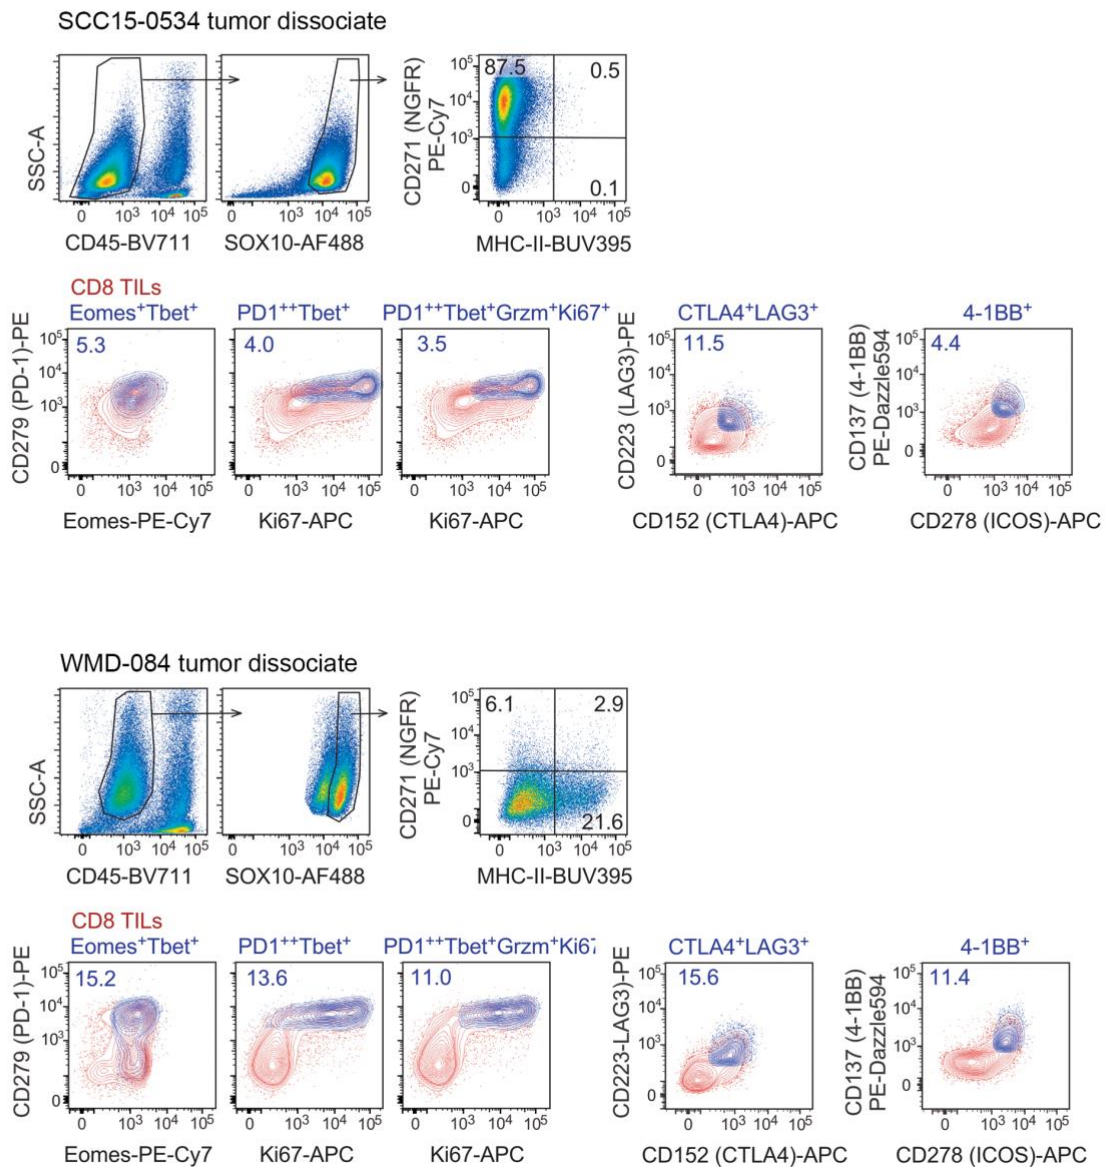

**Fig. S3: Persistent IFN $\gamma$  signaling and immune cell content**

Representative flow cytometric profiles of the SMU15-0534 (intrinsic IFN $\gamma$  signaling) and the WMD-084 (no intrinsic IFN $\gamma$  signaling) tumor dissociates showing identification of NGFR<sup>+</sup>/SOX10<sup>+</sup> melanoma cells (quadrants shows frequency) and antigen experienced PD1<sup>++</sup> CD8 T cells. CD8 T cells shown in red and subsets of CD8 T cells expressing activation or inhibitory receptors shown in blue, with cell frequencies indicated.

Figure S4

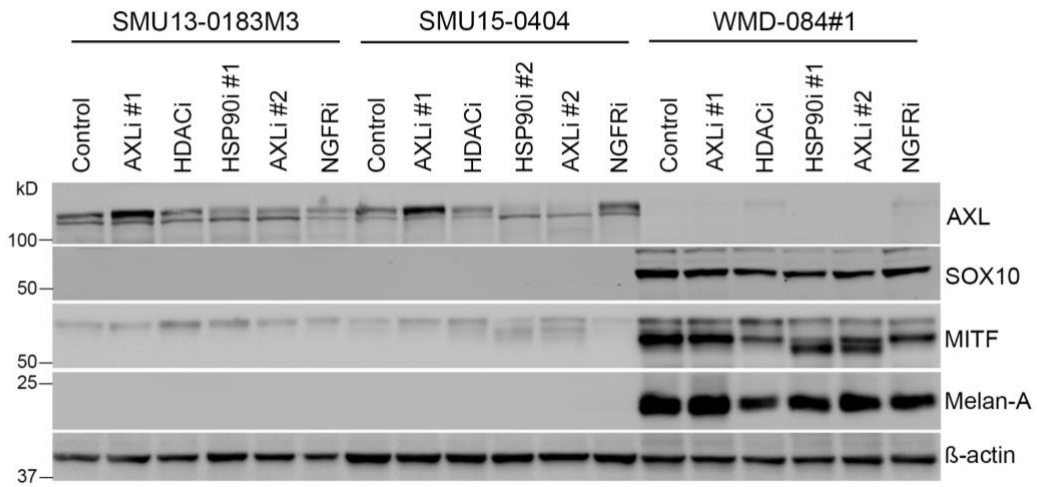

**Fig. S4: Restoration of melanoma antigen in de-differentiated PD1 PROG**

Accumulation of the AXL, SOX10, MITF and Melan-A protein in the de-differentiated SMU13-0183M3 and SMU15-0404 and the differentiated WMD-084#1, 72h after treatment with AXL inhibitors (AXLi#1, 1  $\mu$ M R428; AXLi#2 300nM 17-AAG), HDAC inhibitor (HDACi, 25 nM panobinostat), HSP90 inhibitors (HSP90i#1, 250nM Ganetespib or HSP90i#2, 50nM Ganetespib) or NGFR inhibitor (NGFRi, 10 $\mu$ M Tyrphostin AG-879). Experiments repeated independently three times.

Figure S5

A

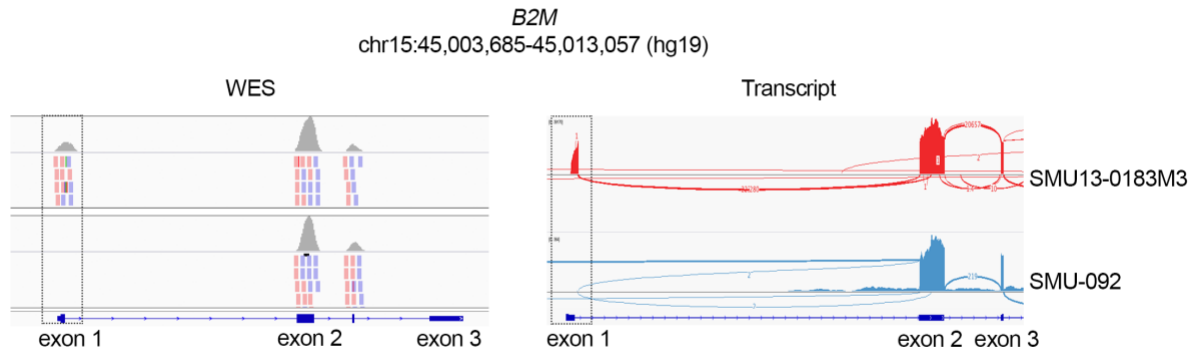

B

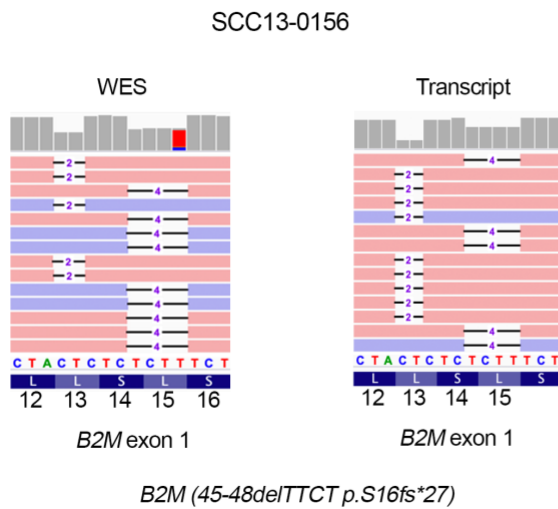

**Fig. S5: Whole exome and transcriptome analysis of SMU13-0156 and SMU-092**

- A. Whole exome (WES) and transcriptome analysis showing a *B2M* exon 1 deletion in SMU-092 compared to SMU13-0183M3.
- B. Whole exome and transcriptome analysis of SCC13-0156 showing a frameshift mutation (c45-48delTTCT, p. S16fs\*27) in *B2M* exon 1.

Figure S6

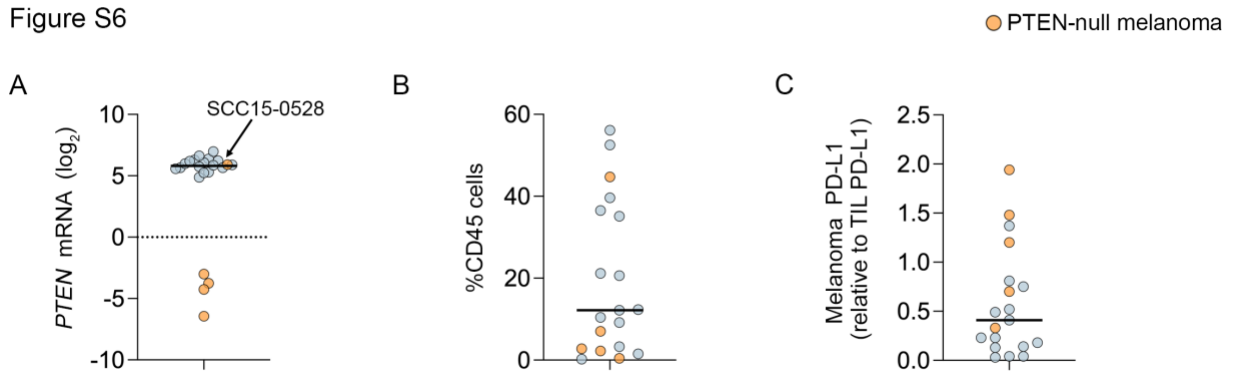

**Fig. S6: PTEN loss is associated with immune exclusion**

- A. *PTEN* transcript expression in PD1 PROG cell lines (n=22). PD1 PROGs highlighted in orange have genetic alterations affecting the *PTEN* locus.
- B. Percentage CD45<sup>+</sup> cells in PD1 PROG tumor dissociates (n=19). Samples corresponding to PD1 PROGs with *PTEN* loss are highlighted in orange.
- C. Melanoma PD-L1 (relative to tumor infiltrating lymphocytes (TILs); MFI melanoma/MFI TILs) in PD1 PROG tumor dissociates (n=20). Samples corresponding to PD1 PROGs with *PTEN* loss are highlighted in orange.

Figure S7

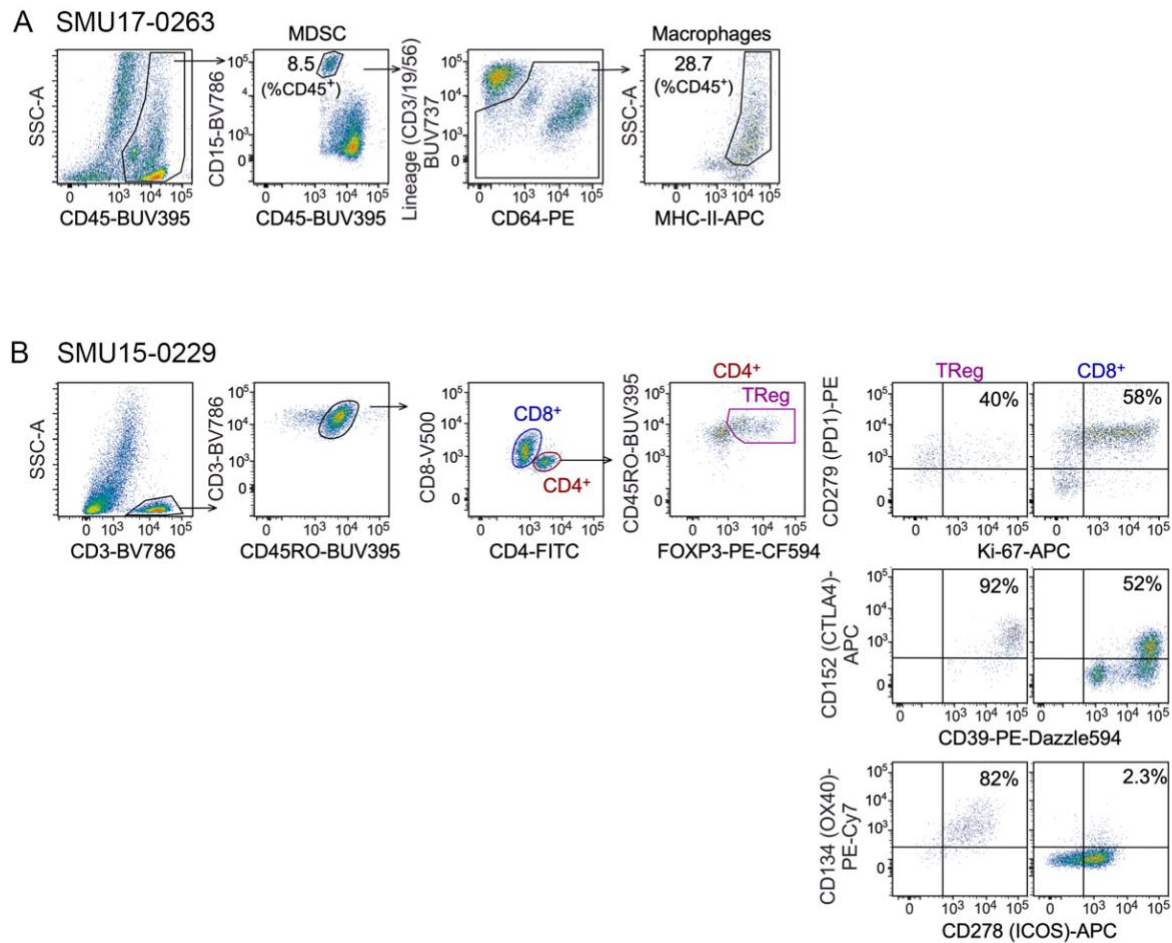

**Fig. S7: Tumor microenvironment of MHC-sufficient brain tumors**

- A. Flow cytometric analysis of the SMU17-0263 tumor dissociate. Frequency of granulocytic myeloid-derived suppressor cells (CD15<sup>+</sup>CD45<sup>int</sup> MDSCs) and macrophages (Lineage<sup>-</sup>CD64<sup>+</sup>MHC-II<sup>+</sup>side scatter<sup>high</sup>) is shown as fraction of CD45<sup>+</sup> cells.
- B. Flow cytometric analysis of the SMU15-0229 tumor dissociate. Phenotype of regulatory T cells (Treg, CD3<sup>+</sup>CD45RO<sup>+</sup>CD4<sup>+</sup>FOXP3<sup>+</sup>) is shown. Phenotype of activated CD8 T cells (CD3<sup>+</sup>CD45RO<sup>+</sup>CD8<sup>+</sup>) is shown for comparison.



Figure S8

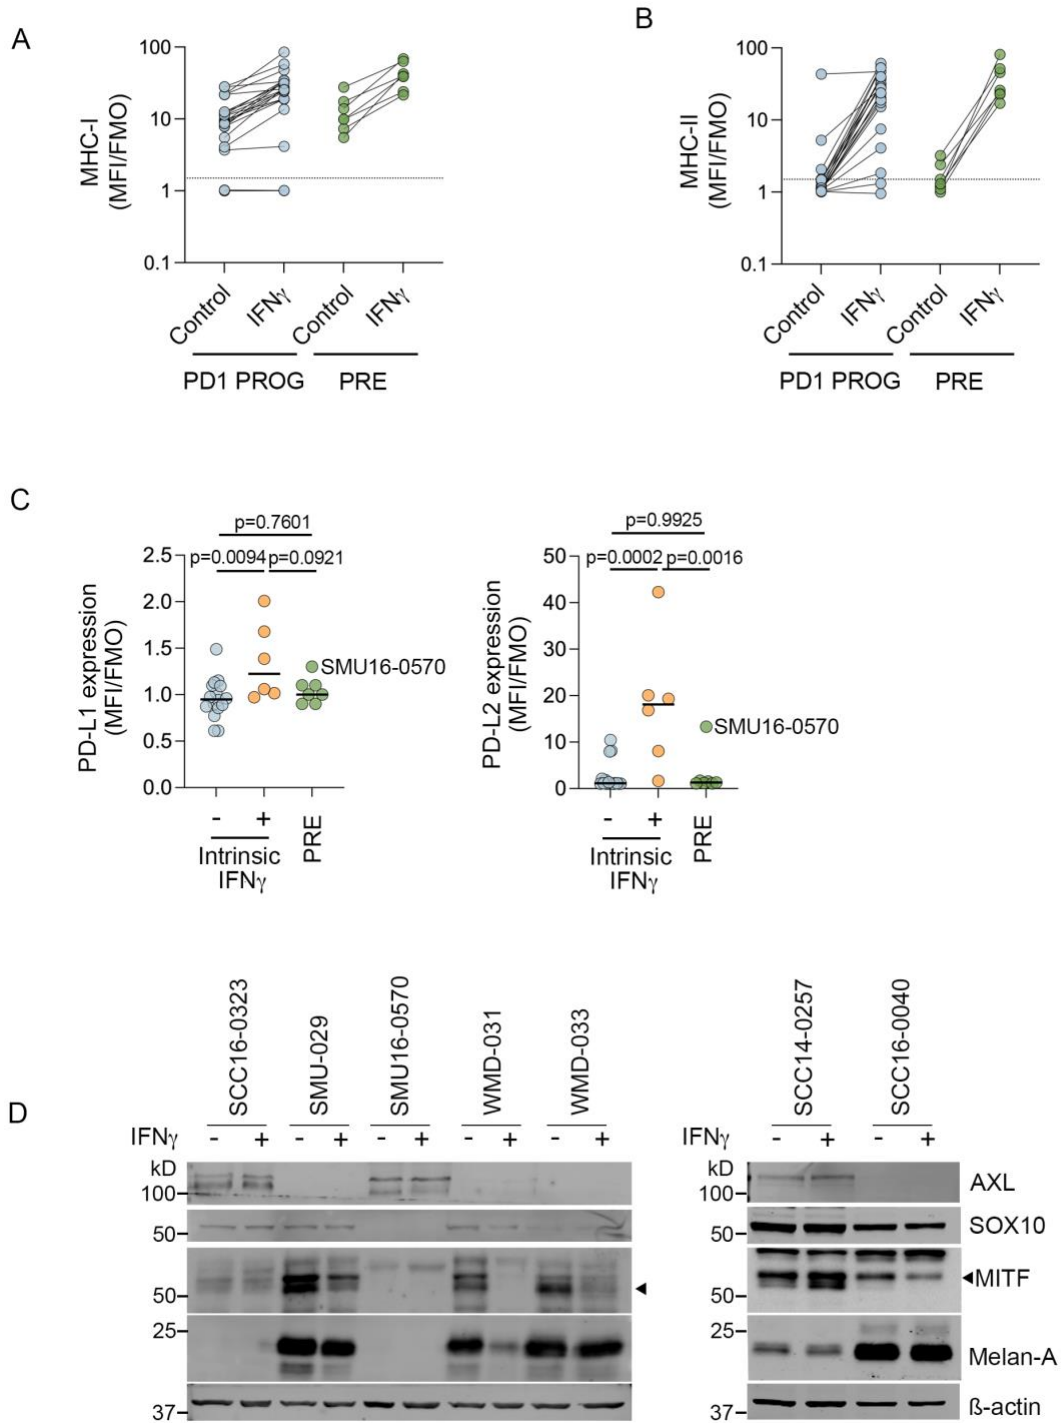

**Fig. S8: Immune checkpoint resistance mechanisms are not enriched in pre-treatment melanoma**

A, B. Cell surface expression (median fluorescence intensity divided by fluorescence minus one control, MFI/FMO) of MHC-I (A) or MHC-II (B) on PD1 PROG cell lines (n=22) and PRE



melanoma cell lines (n=7), 72 h after treatment with vehicle control or IFN $\gamma$  (1000 U/ml). Data representative of 3-4 biological replicates.

- C. Plots showing relative cell surface expression at baseline (median fluorescence intensity stained divided by fluorescence minus one control, MFI/FMO) of PD-L1 and PD-L2 in PD1 PROGs with intrinsic IFN $\gamma$  activity (n=6) compared to PD1 PROGs without intrinsic IFN $\gamma$  activity (n=15) and PRE melanoma cell lines (n=7). Data compared using one-way ANOVA with Tukey's multiple comparison test, adjusted p values are shown.
- D. Accumulation of differentiation markers AXL, SOX10, MITF and Melan-A in PRE melanoma cells. Experiments repeated independently at least three times.

Figure S9

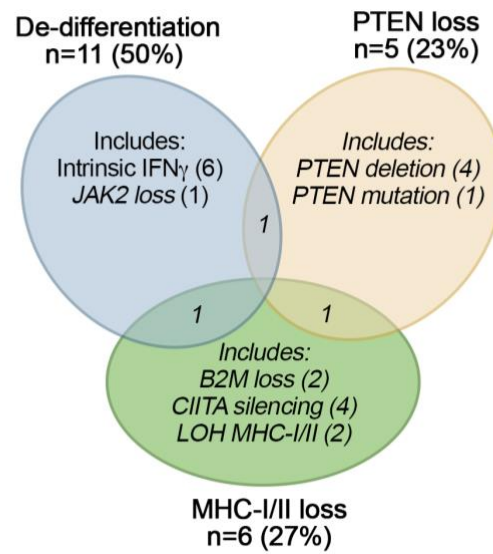

**Fig. S9: Mechanisms of melanoma resistance to immune checkpoint inhibitor therapies**

Venn diagram showing a summary of the immune checkpoint inhibitor resistance mechanisms identified in the 19/22 PD1 PROG melanoma cell models. LOH, loss of heterozygosity.

Figure S10

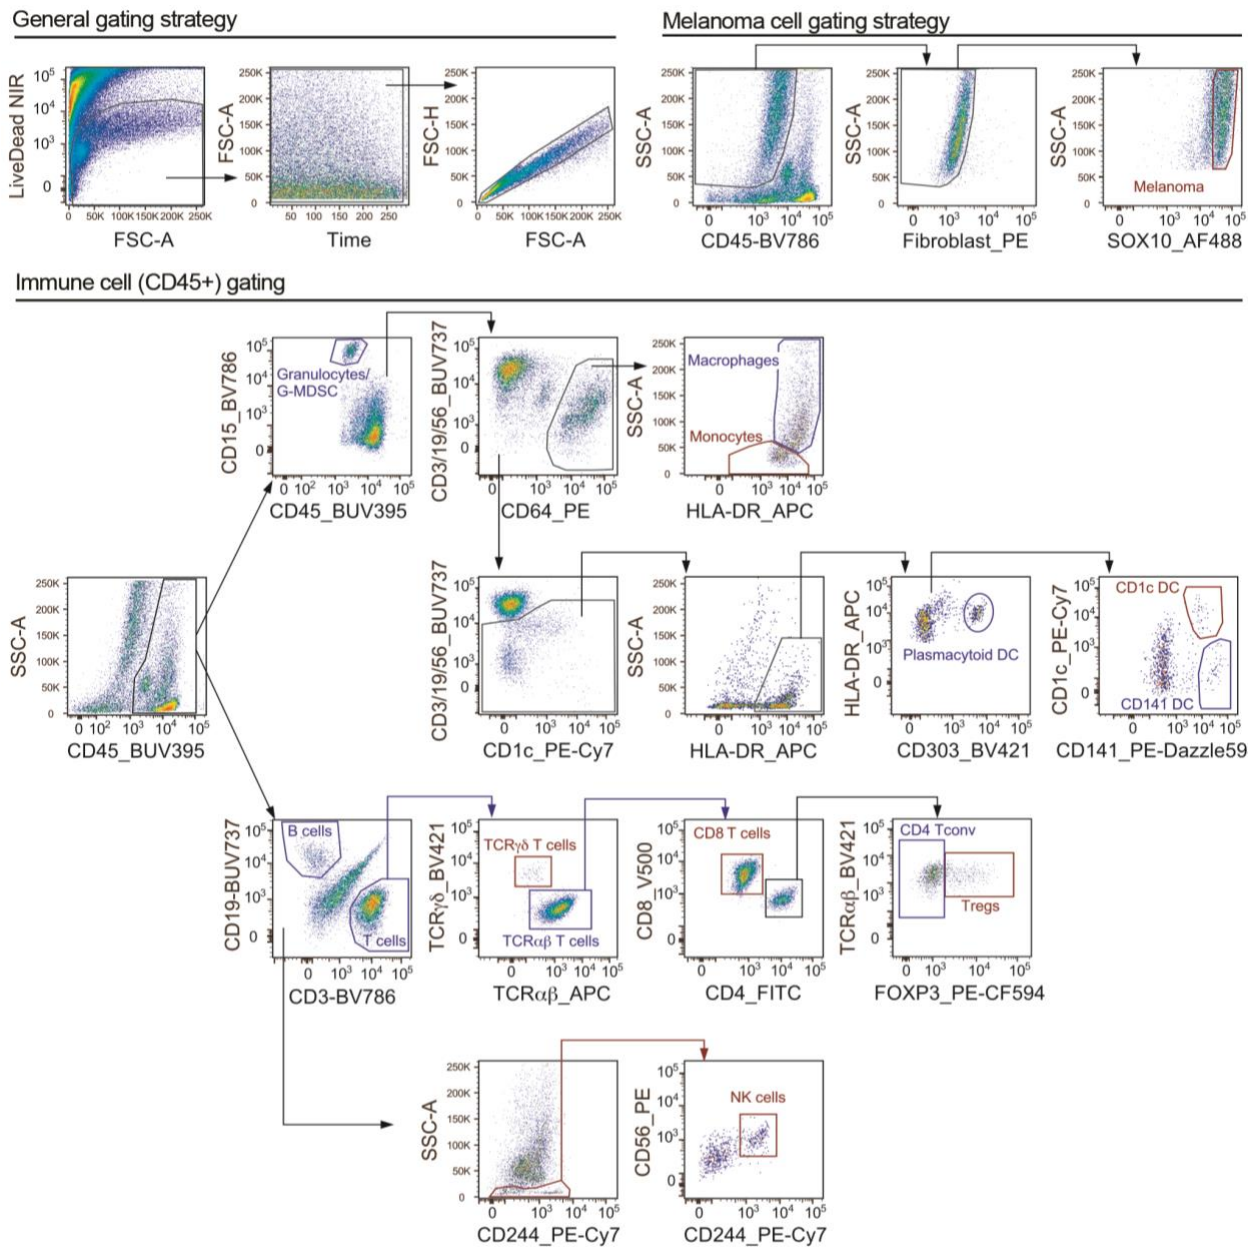

**Fig. S10. Flow cytometry gating strategy for tumor dissociate analysis**

Top row, general gating strategy (left to right: Live cell gate; Time gate; Single cell gate). Melanoma cells were gated as  $SSC-A^{int/high}CD45^{neg}Fibroblast^{neg}SOX10^{+}$ .

Immune infiltrating ( $CD45^{+}$ ) cells were analyzed for myeloid and lymphoid subsets using two separate antibody panels. Myeloid subsets (second and third row) were defined as follows: granulocytes/myeloid-derived suppressor cells (G-MDSCs;  $CD45^{int}SSC-A^{int}CD15^{+}$ ); tumor-associated macrophages ( $CD45^{+}CD15^{neg}Lineage(CD3/19/56)^{neg}HLA-DR^{+}CD64^{+}SSC-A^{high}$ ); monocytes ( $CD45^{+}CD15^{neg}Lineage(CD3/19/56)^{neg}HLA-DR^{+}CD64^{int}SSC-A^{int}$ );  $CD45^{+}CD15^{neg}CD64^{neg}Lineage^{neg}$  cells were further analyzed for plasmacytoid dendritic cells (pDCs,  $CD45^{+}SSC-A^{low}Lineage^{neg}HLA-DR^{+}CD64^{neg}CD303^{+}$ );  $CD141^{+}$  DCs ( $CD45^{+}SSC-A^{low}Lineage^{neg}HLA-DR^{+}CD64^{neg}CD303^{neg}CD1c^{neg}CD141^{+}$ ) and  $CD1c^{+}$  DCs ( $CD45^{+}SSC-A^{low}Lineage^{neg}HLA-DR^{+}CD64^{neg}CD303^{neg}CD141^{neg}CD1c^{+}$ ).

Lymphoid subsets (fourth and fifth row) were analyzed for B cells ( $CD45^{+}SSC-A^{low}CD3^{+}CD19^{+}$ ), T cells ( $CD45^{+}SSC-A^{low}CD3^{+}CD19^{+}$ ) and natural killer (NK) cells ( $CD45^{+}SSC-A^{low}CD3^{+}CD19^{-}CD244^{+}CD56^{+}$ ). T cells were further gated for T-cell receptor alpha beta (TCRab;  $CD45^{+}SSC-A^{low}CD3^{+}TCRgd^{neg}TCRab^{+}$ ) and TCR gamma delta T cells (TCRgd;  $CD45^{+}SSC-A^{low}CD3^{+}TCRab^{neg}TCRgd^{+}$ ); TCRab T cells were further gated for CD8 T cells ( $CD45^{+}SSC-A^{low}CD3^{+}TCRab^{+}CD4^{+}CD8^{+}$ ), CD4 T-conventional (Tconv;  $CD45^{+}SSC-A^{low}CD3^{+}TCRab^{+}CD8^{-}CD4^{+}FOXP3^{-}$ ) and T-regulatory cells (Treg;  $CD45^{+}SSC-A^{low}CD3^{+}TCRab^{+}CD8^{-}CD4^{+}FOXP3^{+}$ ). Shown is a representative example of tumor dissociate analysis (SMU17-0263).

## Supplementary Reference

- 1 Lee, J. H. *et al.* Transcriptional downregulation of MHC class I and melanoma de-differentiation in resistance to PD-1 inhibition. *Nature Communications* **11**, 1897, doi:10.1038/s41467-020-15726-7 (2020).

Figure S2

A

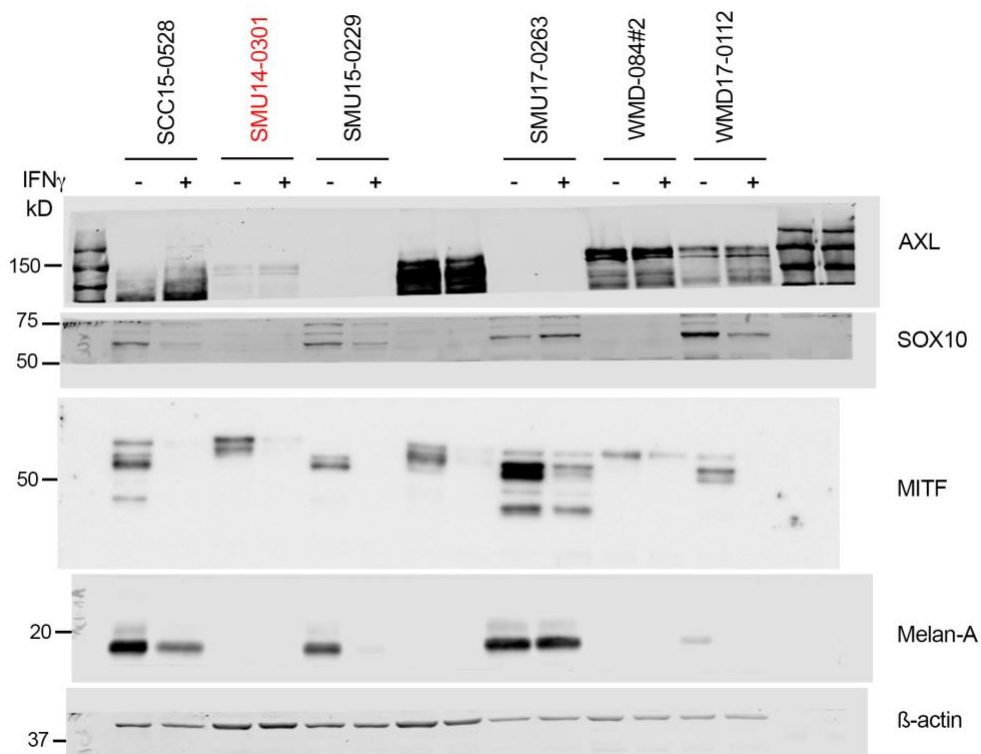

B

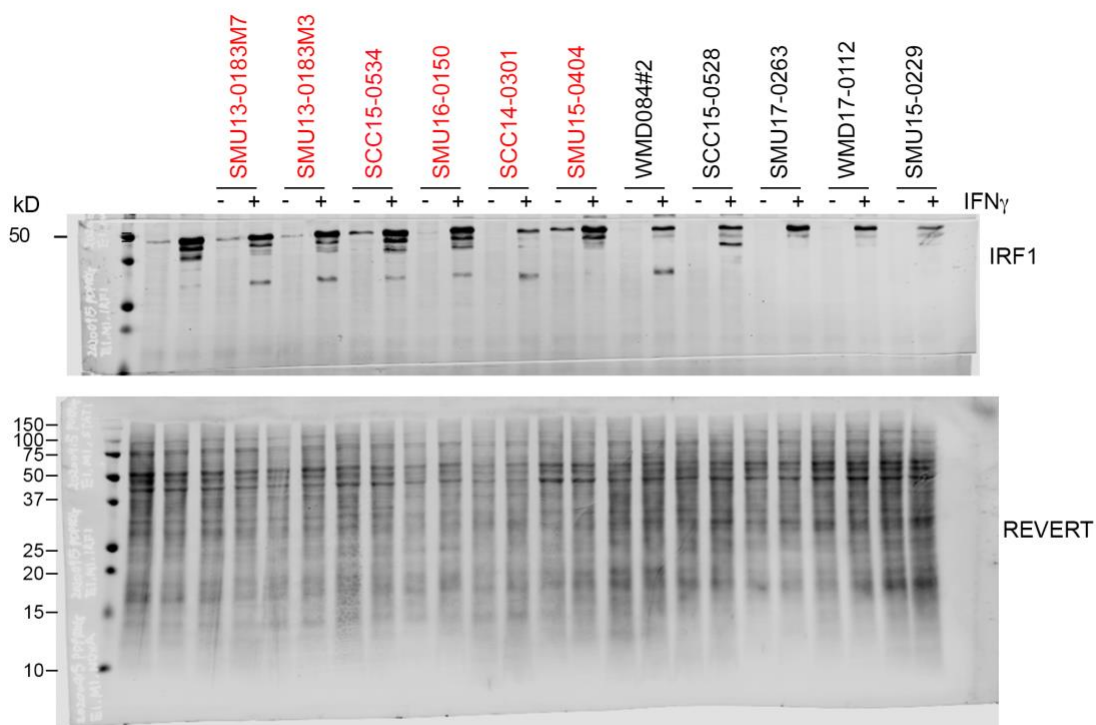

Fig. S2: Uncropped western blots

Figure S4

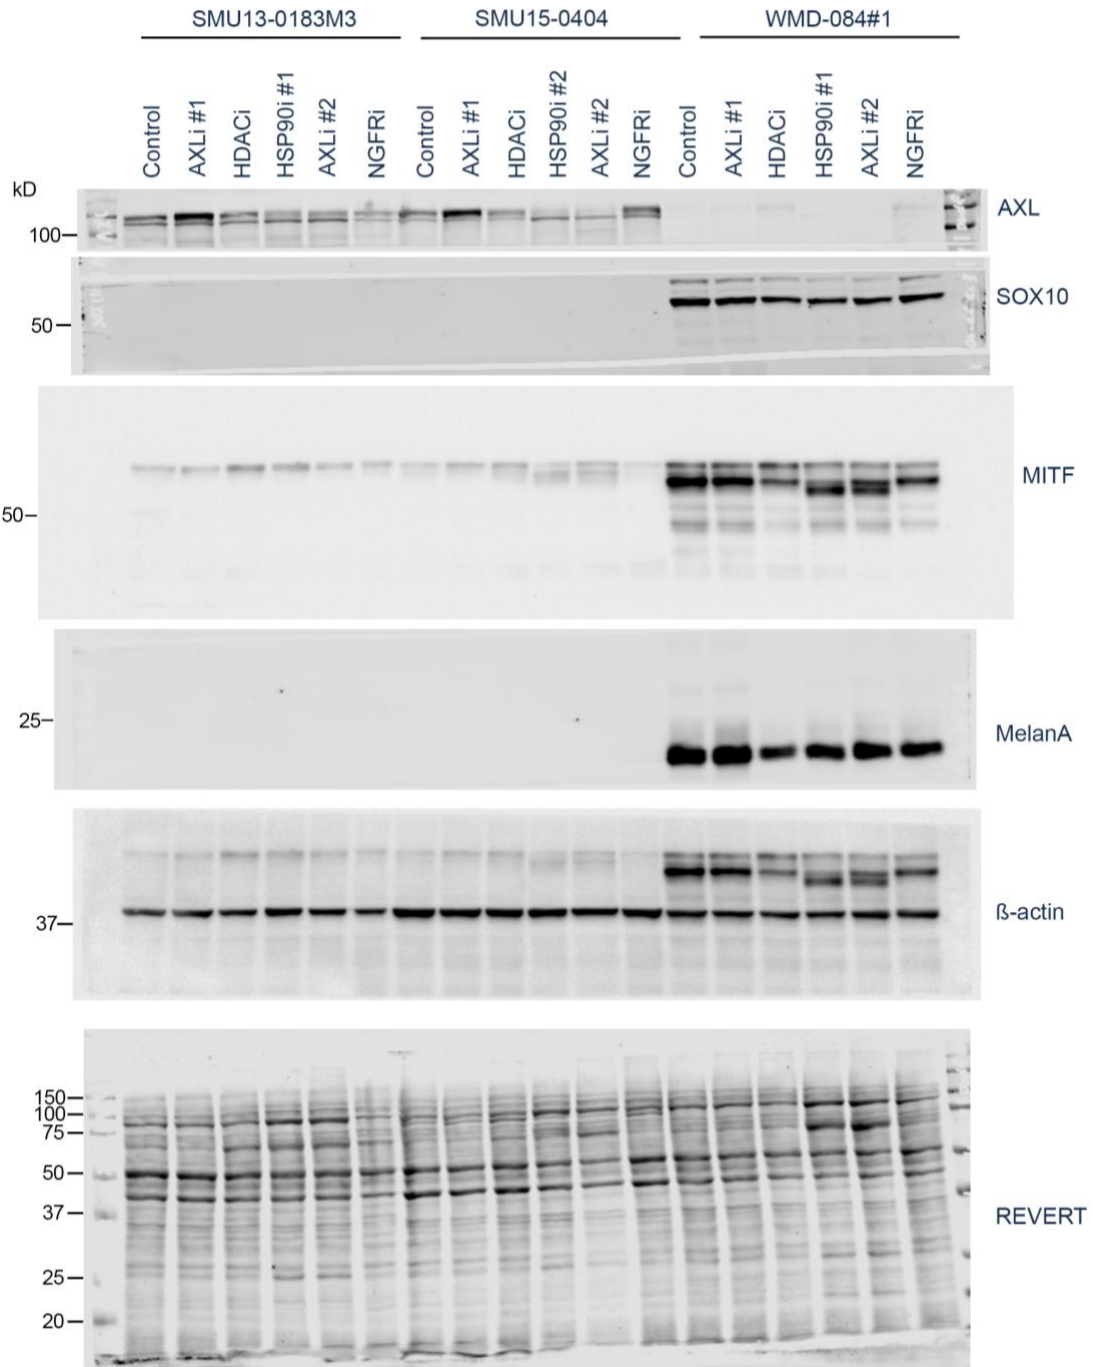

**Fig. S4:** Uncropped western blots

Figure S8  
D

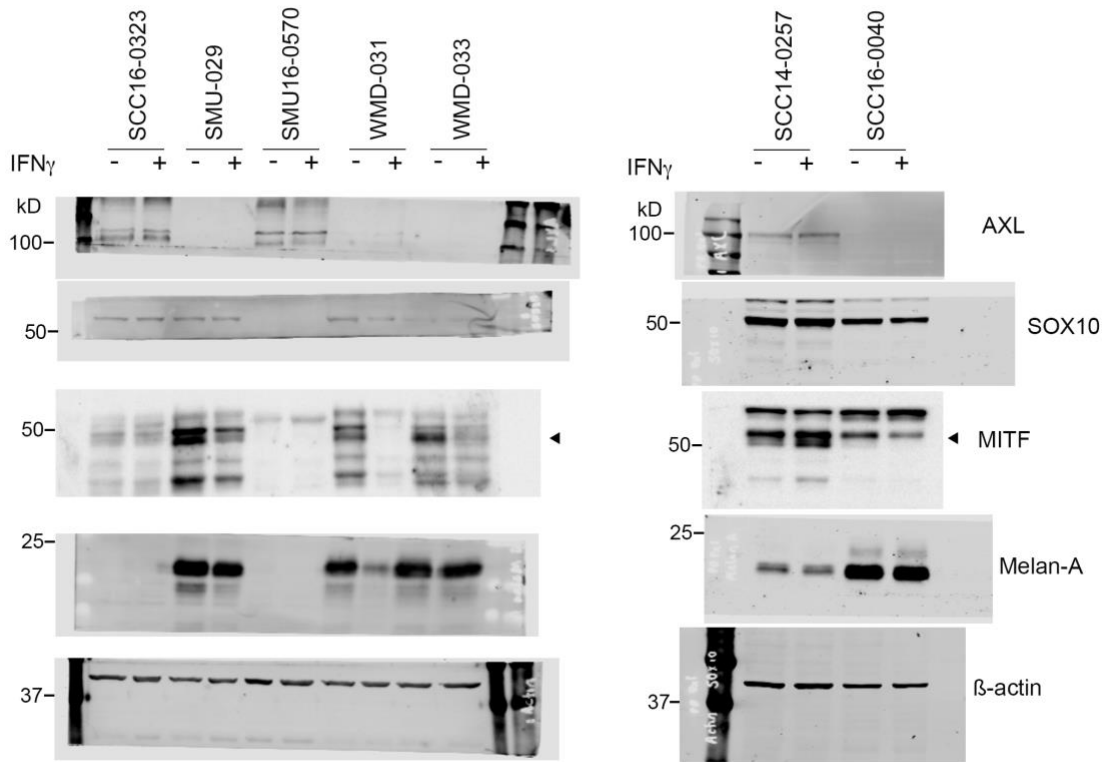

**Fig. S8D:** Uncropped western blots



**Supplementary Table S1: Baseline clinicopathologic characteristics of melanoma patients**

| Characteristics                               | Patients (n=18) |
|-----------------------------------------------|-----------------|
| Age, median (range) <sup>a</sup>              | 65.5 (31-81)    |
| Sex, n (%)                                    |                 |
| Male                                          | 6 (33)          |
| Female                                        | 12 (67)         |
| Treatment                                     |                 |
| Single agent PD1                              | 9 (50)          |
| Combination PD1 and CTLA4                     | 9 (50)          |
| Prior therapy                                 |                 |
| Yes                                           | 10 (56)         |
| No                                            | 8 (44)          |
| M Stage (AJCC 8 <sup>th</sup> edition), n (%) |                 |
| M1b                                           | 3 (17)          |
| M1c                                           | 7 (39)          |
| M1d                                           | 8 (44)          |
| Mutation, n (%)                               |                 |
| BRAF <sup>V600</sup>                          | 10 (56)         |
| NRAS                                          | 6 (33)          |
| Other <sup>b</sup>                            | 2 (11)          |
| LDH at baseline, n (%)                        |                 |
| ≤ ULN                                         | 11 (61)         |
| > ULN                                         | 6 (33)          |
| Unknown                                       | 1 (6)           |
| Response (RECIST 1.1), n (%)                  |                 |
| PR                                            | 6 (33)          |
| SD                                            | 3 (17)          |
| PD                                            | 9 (50)          |

<sup>a</sup>Age at time of PD1 PROG biopsy resection

<sup>b</sup>One patient had a BRAF G469E mutation and another had an NF1 truncating mutation.

Abbreviations: ULN, upper limit of normal; PR, partial response; SD, stable disease; PD, progressive disease

**Supplementary Table S2: Detailed characteristics of patients and PD1 PROG melanoma cell lines used in this study**

| Patient ID | PD1 PROG                     | Sex | Disease stage at treatment | Mutation status | Prior therapy                                                                                                                    | LDH at baseline | Treatment                                | Clinical trial    | irRC | Type of disease progression | Site of biopsy     | Treatment at time of biopsy | On treatment at time of biopsy |
|------------|------------------------------|-----|----------------------------|-----------------|----------------------------------------------------------------------------------------------------------------------------------|-----------------|------------------------------------------|-------------------|------|-----------------------------|--------------------|-----------------------------|--------------------------------|
| SCC11-0270 | SCC11-0270                   | M   | M1d                        | BRAF V600E      | BRAF <sup>i</sup> + MEK <sup>i</sup> (dabrafenib + trametinib)                                                                   | Normal          | Nivolumab 3mg/kg q2w                     | ABC BMS CA209-170 | PD   | Innate                      | Brain              | Nivolumab                   | Yes                            |
| SCC13-0156 | SCC13-0156                   | F   | M1c                        | BRAF V600E      | 1. anti-PD1 (pembrolizumab)<br>2. BRAF <sup>i</sup> + MEK <sup>i</sup> + LEE <sup>i</sup> (binimetinib, ribociclib, encorafenib) | Normal          | Nivolumab 3mg/kg q2w                     |                   | SD   | Acquired                    | Retroperitoneal LN | Nivolumab                   | Yes                            |
| SCC15-0111 | SCC15-0111                   | M   | M1c                        | BRAF V600K      | BRAF <sup>i</sup> + MEK <sup>i</sup> (dabrafenib + trametinib)                                                                   | Normal          | Pembrolizumab 2mg/kg q3w                 |                   | PR   | Innate                      | Brain              | Pembrolizumab               | Yes                            |
| SCC15-0528 | SCC15-0528                   | M   | M1b                        | BRAF V600E      | BRAF <sup>i</sup> + MEK <sup>i</sup> (dabrafenib + trametinib)                                                                   | Normal          | Ipilimumab 3mg/kg+ nivolumab 1mg/kg q3w  | BMS CA209-511     | PD   | Innate                      | Thigh subcutaneous | Ipilimumab + nivolumab      | Yes                            |
| SCC15-0534 | SCC15-0534                   | F   | M1b                        | NRAS Q61K       | None                                                                                                                             | Normal          | Pembrolizumab 2mg/kg                     |                   | PR   | Acquired                    | Neck               | Pembrolizumab               | Yes                            |
| SMU-059    | SMU-059                      | F   | M1c                        | NRAS Q61R       | Ipilimumab                                                                                                                       | > 1x ULN        | Pembrolizumab 2mg/kg q3w                 |                   | PD   | Innate                      | Flank subcutaneous | Pembrolizumab               | Yes                            |
| SMU-092    | SMU-092                      | F   | M1d                        | NRAS Q61L       | None                                                                                                                             | > 1x ULN        | Ipilimumab 3mg/kg + nivolumab 1mg/kg q3w | ABC BMS CA209-170 | PR   | Acquired                    | Breast             | None                        | No                             |
| SMU11-0376 | SMU11-0376M2<br>SMU11-0376M4 | F   | M1d                        | BRAF V600E      | BRAF <sup>i</sup> + MEK <sup>i</sup> (dabrafenib + trametinib)                                                                   | Normal          | Nivolumab 3mg/kg q2w                     | ABC BMS CA209-170 | PD   | Innate                      | Brain              | Nivolumab                   | Yes                            |
| SMU13-0183 | SMU13-0183M3<br>SMU13-0183M7 | F   | M1d                        | BRAF V600E      | BRAF <sup>i</sup> + MEK <sup>i</sup> (dabrafenib + trametinib)                                                                   | Normal          | Nivolumab 3mg/kg q2w                     | ABC BMS CA209-170 | PD   | Innate                      | Brain              | Nivolumab                   | Yes                            |
| SMU14-0301 | SMU14-0301                   | F   | M1c                        | BRAF V600E      | BRAF <sup>i</sup> + MEK <sup>i</sup> (dabrafenib + trametinib)                                                                   | > 1x ULN        | Pembrolizumab 10mg/kg q2w                | MK3475-006        | SD   | Acquired                    | Retroperitoneal LN | Pembrolizumab               | Yes                            |
| SMU15-0229 | SMU15-0229                   | M   | M1c                        | BRAF V600E      | BRAF <sup>i</sup> + MEK <sup>i</sup> (dabrafenib + trametinib)                                                                   | > 2x ULN        | Ipilimumab 3mg/kg+ nivolumab 1mg/kg q3w  |                   | PD   | Innate                      | Brain              | None                        | No                             |
| SMU15-0404 | SMU15-0404                   | F   | M1d                        | BRAF G469R      | None                                                                                                                             | Normal          | Pembrolizumab 120 mg q3w                 |                   | SD   | Innate                      | Axillary LN        | Pembrolizumab               | Yes                            |

|            |                            |   |     |            |                                                                                                            |          |                                              |                   |    |          |                            |               |     |
|------------|----------------------------|---|-----|------------|------------------------------------------------------------------------------------------------------------|----------|----------------------------------------------|-------------------|----|----------|----------------------------|---------------|-----|
| SMU16-0150 | SMU16-0150                 | F | M1d | BRAF V600K | None                                                                                                       | Normal   | Ipilimumab 3mg/kg + nivolumab 1mg/kg         | ABC BMS CA209-170 | PD | Innate   | Scalp                      | None          | No  |
| SMU17-0263 | SMU17-0263                 | M | M1d | NF1 R1241* | None                                                                                                       | Unknown  | Ipilimumab 3mg/kg + nivolumab 1mg/kg q3w     |                   | PD | Innate   | Brain                      | None          | No  |
| WMD-084    | WMD-084#1<br>WMD-084#2     | F | M1c | NRAS Q61K  | None                                                                                                       | > 2x ULN | Ipilimumab 1mg/kg + Pembrolizumab 2mg/kg q3w | MK3475-029        | PR | Acquired | Ovaries                    | Pembrolizumab | Yes |
| WMD15-083  | WMD15-083#1<br>WMD15-083#2 | F | M1c | NRAS Q61K  | None                                                                                                       | Normal   | Ipilimumab 1mg/kg + pembrolizumab 2mg/kg q3w | MK3475-029        | PR | Acquired | Small bowel<br>Large colon | None          | No  |
| WMD17-0112 | WMD17-0112                 | F | M1d | BRAF V600E | 1. anti-PD1 + anti-<br>IDO1 (nivolumab +<br>BMS-986205)<br>2. BRAFi + MEKi<br>(dabrafenib +<br>trametinib) | > 1x ULN | Ipilimumab 3mg/kg + nivolumab 1mg/kg q3w     |                   | PD | Innate   | Thigh<br>subcutaneous      | Nivolumab     | Yes |
| SCC16-0016 | SCC16-0016                 | M | M1b | NRAS Q61K  | None                                                                                                       | Normal   | Ipilimumab 1mg/kg + pembrolizumab 2mg/kg q3w | MK3475-029        | PR | Acquired | Pancreas                   | Pembrolizumab | Yes |

irRC: immune-related RECIST criteria; CR, complete response; PR, partial response; SD, stable disease; PD, progressive disease; Sex: M, male; F, female; Biopsy site: LN, lymph node; SC, subcutaneous; LDH, lactate dehydrogenase, PROG, progressing, ULN, upper limit of normal

**Supplementary Table S3: Detailed characteristics of PRE-treatment melanoma cell lines used in this study**

| Patient ID | PRE-treatment cell line | Sex | Disease stage at treatment | Mutation status          | Prior therapy | LDH at baseline | Subsequent immunotherapy                 | irRC | Site of biopsy |
|------------|-------------------------|-----|----------------------------|--------------------------|---------------|-----------------|------------------------------------------|------|----------------|
| SCC14-0257 | SCC14-0257              | F   | IIIC                       | BRAF V600K               | None          | Normal          | None                                     | NA   | Shin           |
| SCC16-0040 | SCC16-0040              | M   | IIIB                       | BRAF V600K               | None          | Normal          | Ipilimumab 3mg/kg + nivolumab 1mg/kg q3w | PR   | Parotid LN     |
| SCC16-0323 | SCC16-0323              | F   | III                        | BRAF L597S, PTEN D92Y*   | None          | Normal          | None                                     | NA   | Axilla LN      |
| SMU-029    | SMU-029                 | M   | III (intransit)            | BRAF V600E               | None          | Normal          | None                                     | NA   | Calf           |
| SMU16-0570 | SMU16-0570              | M   | M1d                        | PTEN p.A192fs*20         | None          | > 1x ULN        | Ipilimumab 1mg/kg + nivolumab 3mg/kg q3w | PR   | Frontal lobe   |
| WMD-031    | WMD-031                 | F   | M1a                        | BRAF V600E, PTEN A126S** | None          | > 1x ULN        | None                                     | NA   | Axilla LN      |
| WMD-033    | WMD-033                 | M   | M1c                        | BRAF V600E               | None          | > 1x ULN        | Pembrolizumab 2mg/kg (1 dose only)       | NA   | Thigh          |

irRC: immune-related RECIST criteria; PR, partial response; Sex: M, male; F, female; Biopsy site: LN, lymph node; LDH, lactate dehydrogenase; ULN, upper limit of normal; NA, not available

\*PTEN D92Y dbSNP1554898067 has unknown clinical significance according to ClinVar

\*\*PTEN A126S dbSNP1554898129 has unknown clinical significance according to ClinVar

**Supplementary Table S4: List of flow cytometry antibodies**

| Antibody                        | Cat No      | Company                                | Dilution | Comment                 |
|---------------------------------|-------------|----------------------------------------|----------|-------------------------|
| Beta-2-microglobulin PE-Cy7     | 316318      | Biolegend                              | 1/200    |                         |
| CD1c (BDCA-1) PE-Cy7            | 331516      | Biolegend                              | 1/40     |                         |
| CD3 AlexaFluor700               | 300424      | Biolegend                              | 1/100    |                         |
| CD3 BV786                       | 565491      | BD Horizon                             | 1/100    |                         |
| CD3 BUV737                      | 564308      | BD Horizon                             | 1/100    |                         |
| CD4 FITC                        | 344604      | Biolegend                              | 1/100    | 1/200 in vitro          |
| CD4 AlexaFluor700               | 357418      | Biolegend                              | 1/40     |                         |
| CD8 V500                        | 561617      | BD Horizon                             | 1/100    | 1/200 in vitro          |
| CD15 BV786                      | 741013      | BD OptiBuild                           | 1/200    |                         |
| CD16 AlexaFluor700              | 557920      | BD Pharmingen                          | 1/50     |                         |
| CD19 BUV737                     | 564303      | BD Horizon                             | 1/50     |                         |
| CD38 PE-Cy7                     | 356608      | Biolegend                              | 1/100    |                         |
| CD39 PE-Dazzle594               | 328224      | Biolegend                              | 1/100    |                         |
| CD45 BV786                      | 563716      | BD Horizon                             | 1/50     |                         |
| CD45 BUV395                     | 563792      | BD Horizon                             | 1/80     |                         |
| CD45RA BUV737                   | 564442      | BD Horizon                             | 1/100    |                         |
| CD45RO BUV395                   | 564291      | BD Horizon                             | 1/30     |                         |
| CD56 PE                         | 130-113-312 | Miltenyi Biotech                       | 1/50     |                         |
| CD64 PE                         | 305007      | Biolegend                              | 1/100    |                         |
| CD69 APC                        | 555533      | BD Pharmingen                          | 1/20     |                         |
| CD103 PE                        | 350206      | Biolegend                              | 1/40     |                         |
| CD107a PE                       | 555801      | BD Pharmingen                          | 1/10     | Intracellular           |
| CD134 (OX-40) PE-Cy7            | 563663      | BD Pharmingen                          | 1/20     |                         |
| CD137 (4-1BB) PE-Dazzle594      | 309826      | Biolegend                              | 1/20     |                         |
| CD141 PE-Dazzle594              | 344120      | Biolegend                              | 1/40     |                         |
| CD152 (CTLA-4) APC              | 17-1529-42  | Thermo Fisher Scientific (eBioscience) | 1/20     |                         |
| CD223 (LAG3) PE                 | 130-105-452 | Miltenyi Biotech                       | 1/11     |                         |
| CD244 PE-Cy7                    | 329520      | Biolegend                              | 1/80     |                         |
| CD271 (NGFR) PE-Cy7             | 345110      | Biolegend                              | 1/100    |                         |
| CD273 (PD-L2) APC               | 329608      | Biolegend                              | 1/20     | 1/50 cell lines         |
| CD274 (PD-L1) BV421             | 329714      | Biolegend                              | 1/50     | 1/40 cell lines         |
| CD278 (ICOS) APC                | 313510      | Biolegend                              | 1/40     |                         |
| CD279 (PD-1) BV421              | 562516      | BD Horizon                             | 1/40     |                         |
| CD303 BV421                     | 566427      | BD Horizon                             | 1/40     |                         |
| EOMES PE-Cy7                    | 25-4877-42  | Thermo Fisher Scientific (eBioscience) | 1/20     |                         |
| Fc block                        | 564220      | BD                                     | 1/200    |                         |
| FLAG APC                        | 130-119-683 | Miltenyi Biotech                       | 1/50     |                         |
| Fibroblast PE                   | 130-100-136 | Miltenyi Biotech                       | 1/11     |                         |
| Fixable Near-IR Dead Cell Stain | L34976      | Thermo Fisher Scientific               | 1/100    |                         |
| FOXP3 AlexaFluor488             | 320212      | Biolegend                              | 1/20     | Intracellular           |
| FOXP3 PE-CF594                  | 563955      | BD Horizon                             | 1/20     | Intracellular           |
| Granzyme B AlexaFluor700        | 560213      | BD Pharmingen                          | 1/100    | Intracellular           |
| HLA-A2 PE-Cy7                   | 561347      | BD Pharmingen                          | 1/100    |                         |
| HLA-A, B, C AlexaFluor 700      | 311438      | Biolegend                              | 1/80     |                         |
| HLA-A, B, C PE                  | 311406      | Biolegend                              | 1/100    |                         |
| HLA-DR FITC                     | 307604      | Biolegend                              | 1/100    |                         |
| HLA-DR APC                      | 307610      | Biolegend                              | 1/80     |                         |
| HLA-DR, DP, DQ BUV395           | 740302      | BD OptiBuild                           | 1/150    |                         |
| Human IgG4-Fc PE                | 9200-09     | Southern Biotech                       | 1/100    | Pembrolizumab detection |

|                     |                 |                                        |              |                   |
|---------------------|-----------------|----------------------------------------|--------------|-------------------|
| IFNgamma AF647      | 563495          | BD Pharmingen                          | 1/20         | Intracellular     |
| Isotype control     | 400202          | Biolegend                              | as indicated | In vitro blocking |
| KI67 APC            | 17-5699-42      | Thermo Fisher Scientific (eBioscience) | 1/200        | Intracellular     |
| Pembrolizumab       |                 | Merck                                  | 20ug/ml      |                   |
| SOX10 AlexaFluor488 | sc-365692 AF488 | Santa Cruz                             | 1/50         | Intracellular     |
| TBET BV421          | 563318          | BD Horizon                             | 1/20         | Intracellular     |
| TCRalpha APC        | 306718          | Biolegend                              | 1/100        |                   |
| TCRgammadelta BV421 | 744870          | BD Optibuild                           | 1/80         |                   |

**Supplementary Table S5: Flow cytometry gating strategy for cell subset identification**

| Subset                                        | Identification <sup>1</sup>                                                                                                   | Further characterization                                                                              |
|-----------------------------------------------|-------------------------------------------------------------------------------------------------------------------------------|-------------------------------------------------------------------------------------------------------|
| Melanoma                                      | CD45-neg_SCC-A-int to high_Fibroblast-neg_SOX-10+                                                                             | MHC class I (HLA-A, B, C)_MHC class II (HLA-DR, DP, DQ)_CD146/MCAM_CD271/NGFR_CD274/PD-L1_CD273/PD-L2 |
| Tumor-infiltrating lymphocytes (TILs)         | CD45+_SCC-A-low_CD3+                                                                                                          | MHC class I (HLA-A, B, C)_MHC class II (HLA-DR, DP, DQ)_CD274/PD-L1_CD273/PD-L2                       |
| Granulocytes/myeloid-derived suppressor cells | CD45-int_SCC-A-int_CD15+                                                                                                      |                                                                                                       |
| Tumor-associated macrophages (TAMs)           | CD45+_SCC-A-high_CD3-neg-CD19-neg_HLA-DR+_CD64+                                                                               |                                                                                                       |
| Monocytes                                     | CD45+_SCC-A-int_CD3-neg-CD19-neg_HLA-DR+_CD64-int                                                                             |                                                                                                       |
| Plasmacytoid dendritic cells (pDC)            | CD45+_SCC-A-low_CD3-neg-CD19-neg_HLA-DR+_CD64-neg_CD303+                                                                      |                                                                                                       |
| CD141+ dendritic cells                        | CD45+_SCC-A-low_CD3-neg-CD19-neg_HLA-DR+_CD64-neg_CD303-neg_CD1c-neg_CD141+                                                   |                                                                                                       |
| CD1c+ dendritic cells (mo-DC)                 | CD45+_SCC-A-low_CD3-neg-CD19-neg_HLA-DR+_CD64-int_CD303-neg_CD141-neg_CD1c+                                                   |                                                                                                       |
| T cells, TCR alpha beta                       | CD45+_SCC-A-low_CD3+_TCRab+                                                                                                   |                                                                                                       |
| T cells, TCR gamma delta                      | CD45+_SCC-A-low_CD3+_TCRgd+                                                                                                   |                                                                                                       |
| CD8 T cells                                   | CD45+_SCC-A-low_CD3+_TCRab+_CD4-neg_CD8+; alternative gating CD45+ or CD45RO+_SCC-A-low_CD3+_CD4-neg_CD8+                     | [CD279/PD-1_Proliferation (Ki-67)_EOMES_TBET_Granzyme B] or [CD278_CD137_CD134]                       |
| Conventional CD4 T cells (Tconv)              | CD45+_SCC-A-low_CD3+_TCRab+_CD8-neg_CD4+_FOXP3-neg; alternative gating CD45+ or CD45RO+_SCC-A-low_CD3+_CD8-neg_CD4+_FOXP3-neg | [CD279/PD-1_Proliferation (Ki-67)_EOMES_TBET_Granzyme B] or [CD278_CD137_CD134]                       |
| Regulatory T cells (Tregs)                    | CD45+_SCC-A-low_CD3+_TCRab+_CD8-neg_CD4+_FOXP3+; alternative gating CD45+ or CD45RO+_SCC-A-low_CD3+_CD8-neg_CD4+_FOXP3+       | [CD279/PD-1_Proliferation (Ki-67)_EOMES_TBET_Granzyme B] or [CD278_CD137_CD134]                       |
| B cells                                       | CD45+_SCC-A-low_CD3-neg_CD19+                                                                                                 |                                                                                                       |
| NK cells                                      | CD45+_SCC-A-low_CD3-neg_CD244+_CD56+/int                                                                                      | CD16                                                                                                  |

<sup>1</sup>General gating (applies to all): Non-Debris (exclude FCS-A-low/SSC-A-low\_Live cells (LiveDead-neg)\_Time gate\_Single cells (FCS-A/FCS-H)
